# Supplementary material
Source: PubMed Central journal article supplement (PMC3051834)
Supplement: NIHMS235246-supplement-Supp_Table_S1-S3.pdf [file NIHMS235246-supplement-Supp_Table_S1-S3.pdf]

Supplemental Table S1. Primers used in gene disruption and complementation.

Underlined regions indicate restriction enzyme sites.

| Primer name       | Primer sequence 5' - 3'                         |
|-------------------|-------------------------------------------------|
| AcuM-F4           | TTAG <u>GTACCT</u> CGAATGCCGTTTCCTCCTG          |
| AcuM-F3           | TTAT <u>CTAGA</u> ATGGCCATGTGCTACGGGCT          |
| AcuM-F2           | GTCGTGACTGGGAAAACCTGGCGATTGGGAGAAATTCGGTGCT     |
| AcuM-F1           | TGCCCAACTCTATAGCAA                              |
| HY                | GGATGCCTCCGCTCGAAGTA                            |
| YG                | CGTTGCAAGACCTGCCTGAA                            |
| HYG-F             | AGCGGATAACAATTTACACAGGA                         |
| AcuM-VER-UP       | ACTATCAAGTCGAAATGGAC                            |
| AcuM-VER-R        | AATCGTCTCATGCTCAGATG                            |
| HY-VER            | TCGGTTTCAGGCAGGTCTTG                            |
| AcuM-REV-F        | ATT <u>CTCGAGAC</u> CTAGATGACTATTCGCAA          |
| AcuM-REV-R        | AAT <u>CTCGAGA</u> ACTGTCAGCAGATATTGCC          |
| AcuM-REV-VER-F    | ACAGCAGGTGGTTACAACCTCTC                         |
| AcuM-REV-VER-R    | ACCTATTATCATCTGCCATCAGC                         |
| Afu1g02860F4      | TG <u>CAAGCTT</u> AGGTAAGACAGGAACCGAGAGG        |
| Afu1g02860F3      | TTAT <u>CTAGAT</u> GTTGTCACGGGTCACAGGA          |
| Afu1g02860F2      | GTCGTGACTGGGAAAACCTGGCGTGACTGATCCTTAGAGAATGTATG |
| Afu1g02860F1      | TCTTCCTCCAGTCTCGACATC                           |
| Afu1g02860-VER-UP | TCTGCACCACGAGCATATGT                            |
| Afu1g02860-VER-R  | AGTCGAGGTGCATCCTGGGT                            |
| Afu1g04140F4      | TTAG <u>GTACCT</u> GACCTCGTGTACATCAAGACC        |
| Afu1g04140F3      | TTAT <u>CTAGAT</u> TCTCAGTGGGGAACGTGCATC        |
| Afu1g04140F2      | GTCGTGACTGGGAAAACCTGGCGTCCACTAGAGTCTATCTGCTG    |
| Afu1g04140F1      | TCTGCGCATACCGCGTCGAC                            |

|                   |                                                         |
|-------------------|---------------------------------------------------------|
| Afu1g04140-VER-UP | TGGCGTCTGGCAGCTGATTG                                    |
| Afu1g04140-VER-R  | TGAAGCGCTCGAACATCGTC                                    |
| Afu2g04600F4      | TTAGGT <u>ACC</u> ATGGTTGTCATCACTCGGAG                  |
| Afu2g04600F3      | TTAT <u>CTAG</u> ATTGAGGCAGATCCCTGAATG                  |
| Afu2g04600F2      | GTCGTGACTGGGAAAACCTGGCGATCCTCTACTATCAAGGTGATCG          |
| Afu2g04600F1      | AGCAGAAGGAGCAACTGTCC                                    |
| Afu2g04600-VER-UP | TTGGATAGCTTACCCGTTTG                                    |
| Afu2g04600-VER-R  | TCAGGTCCCAGATGCAGCAC                                    |
| Afu2g16310F4      | ATT <u>CTGAG</u> TCGCTAGATGACTGGGATCG                   |
| Afu2g16310F3      | TTA <u>ACTAG</u> TTCACACTCTATACGTCTCG                   |
| Afu2g16310F2      | GTCGTGACTGGGAAAACCTGGCGATGTAACCAAGCGCTCCAAC             |
| Afu2g16310F1      | TGTCCAAGTCTGCAGAGATACC                                  |
| Afu2g16310-VER-UP | ATGACACAGGCTTACAGATC                                    |
| Afu2g16310-VER-R  | TGTATCACGAACAGACTG                                      |
| Afu4g09710F4      | AATGGT <u>ACC</u> ACTTCCTGTTGTCGGTTCGA                  |
| Afu4g09710F3      | AATA <u>AGCT</u> TAGCAACACGTCTCTATCGGT                  |
| Afu4g09710F2      | TCGTTTTACAACGTCGTGACTGGGAAAACCTGGCGTGATGGGACTCGTGCCACTT |
| Afu4g09710F1      | TGATCTGCTTGCAGACTACT                                    |
| Afu4g09710-VER-UP | TCGACCATCTGATCCATCAC                                    |
| Afu4g09710-VER-R  | AGGACGATTCGACCGAATAG                                    |
| Afu5g06190F4      | TTAGGT <u>ACC</u> ACCGTCACGTCAATATCGCC                  |
| Afu5g06190F3      | TGCA <u>AGCT</u> TAGTCTATATGGCTATGATCC                  |
| Afu5g06190F2      | GTCGTGACTGGGAAAACCTGGCGAGCAGTAACCTGTGGATAATCG           |
| Afu5g06190F1      | ACTCCGTAGAATGATGTTGCTG                                  |
| Afu5g06190-VER-UP | AAGCAGAGCCTTGCTCATTC                                    |
| Afu5g06190-VER-R  | TCCGACAATCTTGCGCAACA                                    |
| Afu5g10130F4      | TTAGGTACCTGACCCTGCTAGTATCTTCCAG                         |
| Afu5g10130F3      | TTAACTAGTTGAGTCTAGTTCAAGTGTCCAG                         |

|                   |                                                          |
|-------------------|----------------------------------------------------------|
| Afu5g10130F2      | GTCGTGACTGGGAAAACCCTGGCGAGACGCACACCAGAAGTAGT             |
| Afu5g10130F1      | TCGATATCCTGGTCTCCTGC                                     |
| Afu5g10130-VER-UP | TCAGCTGGTACTGAAGGACGA                                    |
| Afu5g10130-VER-R  | ATGCAACTCTCAAGCTCGAG                                     |
| Afu6g07170F4      | ATTGGTACCACACAGACGTTACACTATGG                            |
| Afu6g07170F3      | TAAACTAGTAGCGTTGCACAAGTTCGACA                            |
| Afu6g07170F2      | TCGTTTTACAACGTCGTGACTGGGAAAACCCTGGCGTGAGCCAGCTGGTGTCTAAC |
| Afu6g07170F1      | ACTATCTGCAGAAGTGTTGC                                     |
| Afu6g07170-VER-UP | TCTTGCCTAGGACGATACTG                                     |
| Afu6g07170-VER-R  | AGCACAATCAGCTTGGTCAC                                     |
| Afu6g09930F4      | TCTGAAGTTCTTCGAGGACC                                     |
| Afu6g09930F3      | TCCTGTGTGAAATTGTTATCCGCTGAGTGAAGTCGATACGACGG             |
| Afu6g09930F2      | GTCGTGACTGGGAAAACCCTGGCGAGTAGGATGATTCGGGTCAAC            |
| Afu6g09930F1      | ATCAGGCTGCTGAAGCTATCC                                    |
| Afu6g09930-VER-UP | AGCAGAGCAACGGACTGTTC                                     |
| Afu6g09930-VER-R  | ATCCCATCCAGCTGTCAG                                       |
| Afu8g05460F4      | TTAGGTACCAAGTGTCTGACTTTGAATCGCTC                         |
| Afu8g05460F3      | TGCAAGCTTACTCTCCGTGGCTTCCAATC                            |
| Afu8g05460F2      | GTCGTGACTGGGAAAACCCTGGCGAGAGCAGTGATAGCAGTCCG             |
| Afu8g05460F1      | ACCCCACTCAAGTAGTAAGCAG                                   |
| Afu8g05460-VER-UP | AGGCTTGAGACGAATAGTGC                                     |
| Afu8g05460-VER-R  | TCATATCCGGAAGAGGACGAG                                    |
| Afu2g10770F4      | TTAGGTACCAGCTCCGGTCTCAGACAAGA                            |
| Afu2g10770F3      | ATTACTAGTTATCTCAGCCGGAAGTGAAG                            |
| Afu2g10770F2      | TCGTTTTACAACGTCGTGACTGGGAAAACCCTGGCGATCATTGCATTGTCAGGACC |
| Afu2g10770F1      | ACACTACGCTGTGCTGTTGG                                     |
| Afu2g10770-VER-UP | ACAACAGACAACTGCGTGAG                                     |
| Afu2g10770-VER-R  | TCGTGTGATTGCGATGGTCA                                     |

|            |                           |
|------------|---------------------------|
| SreA-gate1 | CACCAATAGTAGCAAGAACAAACAG |
| SreA-gate2 | CGCTCAGAACAACCGTACAA      |
| SreA-gate3 | CACCCTTGCCTTTTTTTGTCTC    |
| SreA-gate4 | ACAACCACACCCTCGACTTC      |
| SreA-ext1  | TCCGTTTGAATTGTCCTTTG      |
| SreA-ext4  | GCACCTTCACCCTCAACTTC      |
| BL         | TGATGAACAGGGTCACGTC       |
| LE         | AAGTTGACCAGTGCCGTTCC      |

---

Primers used in real-time RT-PCR verification.

| Gene name   | Locus      | Forward primer (5' - 3') | Reverse primer (5' - 3') |
|-------------|------------|--------------------------|--------------------------|
| <i>hapX</i> | Afu5g03920 | AACAGTCCAGACGTCTTG       | TGGTGTGAATTGGGACAG       |
| <i>sreA</i> | Afu5g11260 | TGATGACCACTACCGATAC      | ATCGGTGGATGATGTGGTC      |
| <i>sidA</i> | Afu2g07680 | AGTGGCAGCATCGCATCC       | TTGAACCTTGCTCAGGAG       |
| <i>sidC</i> | Afu1g17200 | TCATCATGCATCATGCTC       | TCAGTAGCTTCGGATGAG       |
| <i>SidD</i> | Afu3g03420 | TGCTACTGTAGTGCGGTC       | TCTACCACGATGTAAGCG       |
| <i>sidG</i> | Afu3g03650 | ATGGTTCGCTATGCCTTC       | AGCGACTTCGAGTCATGC       |
| <i>sidF</i> | Afu3g03400 | TCACTCATGGTGGTCGAC       | ATCGTAGTGTGCTCCGTAG      |
|             | Afu3g03390 | TGAGTCTGACGAGTCCTG       | CAGTAACGTGTCCTTGTC       |
| <i>sirB</i> | Afu3g03640 | ACTACTGCTATGCCAGCT       | ATCTCGCACATAACGATG       |
| <i>sit1</i> | Afu7g06060 | TCTACACC GTTCTCATTG      | TGATTCTGTCATGATTGG       |
|             | Afu7g04730 | ATGACTGGCTACATGACC       | ATCTGGCACATAATCACG       |
| <i>fre2</i> | Afu1g17270 | TGCACGTCCAACCTCGGTT      | TCAGACTACGGCATTGAG       |
| <i>ftr2</i> | Afu5g03800 | TCGTATGACATCCGACAG       | ACGATCACCGCAATCCAG       |
| <i>acuM</i> | Afu2g12330 | TGTGAAAGGCTACGCTCGCT     | TCTGCCATCTCCTTGTTGCC     |
| <i>acuF</i> | Afu6g07720 | TGATGATGAGCACTGCTG       | ATCGCTGAGGAGGAT          |
| <i>Fbp1</i> | Afu4g11310 | AGCTCGTCATCACCATGC       | TCAGCGACCATGCTGCCA       |
| <i>tef1</i> | Afu1g06390 | GTGACTCCAAGAACGATCC      | AGA ACTTGCAAGCAATGTGG    |

---

## Down-regulated at 18 or 24h

Table 2

| Locus      | Comm_Name                                                            | Genes down-regulated in the acuM deletion mutant (Log2 values) |          |            |            |          |          |            |            |
|------------|----------------------------------------------------------------------|----------------------------------------------------------------|----------|------------|------------|----------|----------|------------|------------|
|            |                                                                      | 18 h WT1                                                       | 18 h WT2 | 18 h Comp1 | 18 h Comp2 | 24 h WT1 | 24 h WT2 | 24 h Comp1 | 24 h Comp2 |
| Afu1g00490 | biotin-dependent 2-oxo acid dehydrogenases acyltransferase, putative | NaN                                                            | -0.564   | -0.558     | -0.435     | -0.397   | -0.061   | -0.119     | 0.093      |
| Afu1g00810 | Asp f7-like allergen, putative                                       | -0.610                                                         | -0.870   | -0.572     | -0.519     | -0.342   | 0.158    | -0.461     | -0.755     |
| Afu1g01480 | MFS peptide transporter (Ptr2), putative                             | -0.334                                                         | -0.410   | -0.406     | -0.338     | -0.176   | -0.402   | -0.048     | -0.352     |
| Afu1g02340 | hypothetical protein                                                 | -0.557                                                         | -0.345   | -0.425     | -0.460     | -0.178   | -0.233   | -0.296     | -0.290     |
| Afu1g02730 | mitochondrial phosphate carrier protein (Ptp), putative              | -1.610                                                         | -1.306   | -1.391     | -0.807     | -0.861   | -0.997   | -0.951     | -1.234     |
| Afu1g02880 | Phosphotransferase enzyme family domain protein                      | -0.446                                                         | -0.664   | -0.382     | -0.415     | -0.747   | -0.677   | -0.611     | -0.363     |
| Afu1g03150 | c-14 sterol reductase                                                | -2.311                                                         | -0.538   | -1.852     | -0.814     | -0.595   | -0.702   | -0.547     | -0.921     |
| Afu1g03610 | hypothetical protein                                                 | -3.863                                                         | -2.430   | -3.059     | -2.039     | -1.417   | -1.059   | -4.044     | -1.250     |
| Afu1g05390 | mitochondrial ADP,ATP carrier protein (Ant), putative                | -0.818                                                         | -0.721   | -0.618     | -0.292     | -0.761   | -0.819   | -0.683     | -0.927     |
| Afu1g05950 | integral membrane protein                                            | -0.897                                                         | -0.570   | -0.945     | -1.205     | -0.565   | -0.614   | -0.553     | -0.973     |
| Afu1g06020 | DnaJ domain protein                                                  | -0.723                                                         | -0.484   | -0.676     | -0.601     | -0.093   | 0.050    | -0.258     | 0.004      |
| Afu1g06040 | sterol o-acyltransferase (APE2), putative                            | -1.004                                                         | -0.720   | -1.124     | -1.566     | -0.582   | -0.404   | -0.163     | -1.544     |
| Afu1g07400 | hypothetical protein                                                 | -0.658                                                         | -0.958   | -0.730     | -0.832     | -0.021   | -0.208   | -0.326     | -0.264     |
| Afu1g07480 | coproporphyrinogen III oxidase, putative                             | -2.594                                                         | -1.515   | -2.190     | -1.156     | -0.330   | -0.003   | -1.230     | -0.082     |
| Afu1g09050 | phospholipid methyltransferase                                       | -0.717                                                         | -0.844   | -0.619     | -0.567     | -0.416   | -0.441   | -0.144     | -0.032     |
| Afu1g09470 | aminotransferase, class V, putative                                  | -0.498                                                         | -0.047   | -0.428     | -0.799     | -0.527   | -0.680   | -0.372     | -0.539     |
| Afu1g10120 | ABC transporter permease protein                                     | -1.477                                                         | -1.365   | -1.925     | -1.251     | -0.168   | 0.082    | 0.275      | -0.005     |
| Afu1g10130 | adenosylhomocysteinase                                               | -1.756                                                         | -2.054   | -2.039     | -1.584     | -0.004   | -0.211   | -0.058     | -0.149     |
| Afu1g10210 | hypothetical protein                                                 | -0.664                                                         | -0.585   | -0.622     | -0.577     | -0.101   | 0.018    | -0.526     | -0.249     |
| Afu1g10350 | phosphoglycerate kinase PgkA, putative                               | -0.770                                                         | -1.033   | -0.511     | -0.751     | -0.910   | -0.451   | -1.003     | -0.817     |
| Afu1g10380 | nonribosomal peptide synthase Afpes1                                 | -2.311                                                         | -2.256   | -2.084     | -1.120     | -1.091   | -1.115   | -0.607     | -0.393     |
| Afu1g10390 | ABC multidrug transporter, putative                                  | -3.610                                                         | -2.798   | -2.922     | -1.744     | -1.122   | -1.370   | NaN        | -0.965     |
| Afu1g10630 | S-adenosylmethionine synthetase                                      | -1.926                                                         | -2.279   | -1.990     | -1.751     | -0.016   | -0.131   | 0.037      | -0.256     |
| Afu1g10780 | glycine cleavage system T protein                                    | -0.645                                                         | -0.919   | -1.092     | -0.977     | 0.115    | 0.130    | 0.230      | 0.097      |
| Afu1g11550 | ethanolamine kinase, putative                                        | -0.516                                                         | -0.494   | -0.362     | -0.449     | -0.434   | -0.379   | -0.301     | -0.110     |
| Afu1g11920 | SH3 domain protein, putative                                         | -0.547                                                         | -0.500   | -0.542     | -0.470     | 0.057    | -0.176   | -0.076     | 0.179      |
| Afu1g11930 | protein kinase, putative                                             | -1.375                                                         | -0.644   | -0.869     | -0.826     | -0.440   | -0.581   | -0.473     | -0.327     |
| Afu1g12070 | glycine cleavage system H protein                                    | -1.029                                                         | -0.891   | -1.606     | -1.001     | -0.124   | -0.043   | 0.071      | 0.055      |
| Afu1g12350 | extracellular fruiting body protein, putative                        | -1.780                                                         | -1.342   | -1.636     | -1.086     | -0.818   | -0.745   | -1.446     | -1.313     |
| Afu1g12690 | ABC multidrug transporter Mdr4                                       | -0.528                                                         | -0.461   | -0.490     | -0.307     | -0.321   | -0.308   | 0.028      | -0.078     |
| Afu1g12800 | isocitrate dehydrogenase, NAD-dependent                              | -0.272                                                         | -0.342   | -0.006     | 0.114      | -0.273   | -0.303   | -0.283     | -0.273     |
| Afu1g14280 | C6 finger domain protein, putative                                   | -0.453                                                         | -0.166   | -0.431     | -0.727     | -0.400   | -0.509   | -0.398     | -0.587     |
| Afu1g14930 | hypothetical protein                                                 | -2.421                                                         | -0.716   | -2.023     | -0.988     | -1.382   | -0.938   | -1.188     | -1.684     |
| Afu1g15140 | mitochondrial phosphate carrier protein (Mir1), putative             | -2.091                                                         | -1.453   | -1.766     | -1.040     | -1.651   | -1.901   | -1.529     | -2.265     |
| Afu1g16030 | conserved hypothetical protein                                       | -0.303                                                         | 0.643    | -0.369     | 0.121      | -0.851   | -0.744   | -0.813     | -0.650     |
| Afu1g16080 | hypothetical protein                                                 | -0.337                                                         | -0.335   | -0.257     | -0.324     | 0.047    | 0.157    | 0.164      | 0.148      |
| Afu1g16190 | cell wall glucanase Crf1                                             | -1.327                                                         | -1.164   | -1.353     | -0.910     | -0.700   | 0.056    | -1.811     | -0.806     |
| Afu1g16280 | mitochondrial F1F0-ATP synthase g subunit, putative                  | -0.753                                                         | -0.933   | -0.516     | -0.584     | -0.497   | -0.510   | -0.776     | -0.740     |
| Afu1g17060 | HLH DNA binding domain protein, putative                             | -1.056                                                         | -0.616   | -1.110     | -1.057     | -0.364   | -0.266   | -0.348     | -0.794     |
| Afu1g17180 | pyridine nucleotide-disulphide oxidoreductase, putative              | -1.645                                                         | -0.743   | -1.838     | -1.362     | -0.593   | -0.690   | 0.200      | -0.517     |
| Afu1g17190 | long-chain-fatty-acid-CoA ligase, putative                           | -1.769                                                         | -1.042   | -1.700     | -1.382     | -0.926   | -1.197   | -0.168     | -1.042     |
| Afu1g17270 | ferric-chelate reductase (Fre2), putative                            | -1.699                                                         | -1.214   | -1.804     | -2.004     | -1.277   | -1.523   | -1.007     | -1.297     |

## Down-regulated at 18 or 24h

|            |                                                               |        |        |        |        |        |        |        |        |
|------------|---------------------------------------------------------------|--------|--------|--------|--------|--------|--------|--------|--------|
| Afu2g01260 | HLH transcription factor, putative                            | -0.508 | 0.256  | -0.406 | -0.037 | -0.577 | -0.396 | -0.405 | -0.397 |
| Afu2g01720 | conserved hypothetical protein                                | -0.728 | 0.411  | -0.050 | 0.193  | -0.482 | -0.508 | -0.471 | -0.554 |
| Afu2g01890 | CAT5 protein                                                  | -1.020 | -0.317 | -1.050 | -0.486 | -0.417 | -0.386 | -0.540 | -0.452 |
| Afu2g02110 | MSF monosaccharide transporter, putative                      | -0.333 | -0.273 | -0.295 | -0.342 | -0.077 | -0.062 | -0.199 | 0.195  |
| Afu2g03020 | MYB DNA-binding domain protein                                | -2.172 | -2.055 | -1.442 | -1.450 | -0.184 | -0.381 | -0.643 | -0.517 |
| Afu2g03420 | mitochondrial translocase complex component (Tim50), putative | -0.247 | 0.074  | -0.165 | 0.100  | -0.259 | -0.251 | -0.268 | -0.285 |
| Afu2g03860 | plasma membrane low affinity zinc ion transporter, putative   | -0.804 | -0.642 | -0.599 | -0.590 | 0.102  | 0.141  | -0.964 | 0.180  |
| Afu2g03990 | hypothetical protein                                          | -1.380 | -1.430 | -1.309 | -1.893 | -0.799 | -1.004 | -0.744 | -1.289 |
| Afu2g05050 | hypothetical protein                                          | -1.269 | -0.986 | -1.095 | -1.073 | -1.027 | -0.523 | -1.098 | -0.747 |
| Afu2g05060 | alternative oxidase                                           | -4.573 | -3.104 | -4.252 | -3.959 | -3.605 | -2.903 | -3.792 | -4.351 |
| Afu2g05400 | sugar hydrolase, putative                                     | -0.522 | -0.580 | -0.623 | -0.347 | -0.245 | 0.078  | -0.123 | 0.213  |
| Afu2g05720 | conserved hypothetical protein                                | -1.504 | -0.985 | -1.375 | -0.726 | -0.360 | -0.188 | -0.033 | -0.095 |
| Afu2g05730 | siderochrome-iron transporter (MirC), putative                | -1.363 | -0.642 | -1.373 | -1.063 | -0.266 | -0.436 | -0.112 | -0.586 |
| Afu2g07620 | cystathionine beta-synthase, putative                         | -1.362 | -2.094 | -1.514 | -1.331 | -0.471 | -0.412 | -0.100 | -0.160 |
| Afu2g07670 | palmitoyltransferase (SidR), putative                         | -0.875 | -0.597 | -0.903 | -0.634 | -0.163 | -0.649 | 0.062  | -0.640 |
| Afu2g07680 | L-ornithine N5-oxygenase SidA                                 | -2.381 | -1.582 | -2.406 | -1.644 | -0.566 | -0.849 | 0.245  | -0.740 |
| Afu2g07810 | cytosolic hydroxymethyltransferase, putative                  | -0.729 | -0.899 | -1.072 | -1.025 | -0.110 | -0.269 | -0.110 | -0.167 |
| Afu2g08010 | conserved hypothetical protein                                | -0.737 | -0.812 | -0.918 | -0.649 | -0.404 | 0.082  | -0.871 | -0.582 |
| Afu2g08080 | conserved hypothetical protein                                | -0.706 | -0.725 | -0.392 | -0.534 | -0.190 | -0.091 | -0.199 | -0.270 |
| Afu2g08280 | NADP-dependent malic enzyme                                   | -3.339 | -3.714 | -2.822 | -2.904 | -1.824 | -2.457 | -1.556 | -2.913 |
| Afu2g09220 | hypothetical protein                                          | -0.560 | -0.465 | -0.556 | -0.415 | -0.056 | 0.107  | -0.041 | 0.084  |
| Afu2g09290 | antigenic mitochondrial protein HSP60, putative               | -0.835 | -0.076 | -0.145 | 0.092  | -0.483 | -0.468 | -0.320 | -0.526 |
| Afu2g09330 | C6 finger domain protein, putative                            | -2.216 | -1.827 | -1.131 | -1.387 | -0.100 | -0.093 | -0.248 | -0.159 |
| Afu2g09340 | fungal specific trascription factor, putative                 | -1.381 | -1.397 | NaN    | NaN    | -0.022 | -0.004 | NaN    | NaN    |
| Afu2g09350 | endo-beta-1,6-glucanase, putative                             | -2.206 | -1.699 | -1.173 | -1.242 | -0.211 | -0.390 | NaN    | -0.735 |
| Afu2g10660 | mannitol-1-phosphate dehydrogenase                            | -0.842 | -0.894 | -1.079 | -0.887 | -0.400 | 0.108  | -0.348 | -0.297 |
| Afu2g11300 | G2882                                                         | -0.671 | -1.649 | -1.225 | -1.341 | 0.346  | 0.107  | 0.448  | 0.135  |
| Afu2g11790 | conserved hypothetical protein                                | -0.733 | -0.923 | -0.606 | -0.694 | -0.213 | -0.266 | -0.521 | -0.400 |
| Afu2g11900 | pyruvate dehydrogenase kinase                                 | -1.293 | -1.023 | -0.946 | -1.222 | -0.283 | -0.520 | -0.148 | -0.246 |
| Afu2g12330 | conserved hypothetical protein                                | -2.754 | -2.214 | -2.997 | -2.963 | -2.206 | -2.653 | -2.453 | -2.656 |
| Afu2g12450 | hydroxymethylglutaryl-CoA lyase                               | -0.445 | -0.397 | -0.478 | -0.350 | -0.320 | -0.095 | -0.312 | 0.322  |
| Afu2g12910 | PtaB protein, putative                                        | -0.575 | -0.538 | -0.402 | -0.480 | -0.001 | -0.083 | -0.077 | 0.051  |
| Afu2g13110 | cytochrome c                                                  | -1.687 | -0.684 | -1.460 | -0.726 | -0.977 | -0.930 | -1.397 | -1.890 |
| Afu2g14970 | Gamma-butyrobetaine hydroxylase subfamily, putative           | -0.652 | -0.780 | -0.599 | -0.381 | 0.082  | 0.023  | -0.048 | 0.129  |
| Afu2g16000 | hypothetical protein                                          | -0.972 | -0.773 | -0.654 | -0.749 | 0.032  | 0.115  | -0.207 | -0.162 |
| Afu2g16860 | membrane transporter                                          | -0.627 | -0.355 | -0.477 | -0.527 | -0.128 | -0.075 | NaN    | -0.229 |
| Afu2g16930 | succinate:fumarate antiporter (Acr1), putative                | -0.641 | NaN    | -0.529 | -0.833 | -0.764 | -0.565 | -0.213 | -0.563 |
| Afu2g17000 | PT repeat family protein                                      | -0.717 | -0.580 | -0.402 | -0.476 | -0.137 | 0.126  | -0.251 | -0.353 |
| Afu2g17300 | glutathione S-transferase                                     | -0.988 | NaN    | -0.590 | -0.712 | -0.254 | -0.253 | NaN    | -0.644 |
| Afu2g17320 | conserved hypothetical protein                                | -1.109 | -1.091 | -1.038 | -0.483 | -0.242 | -0.356 | -0.050 | -0.305 |
| Afu2g17330 | serine peptidase, family S28, putative                        | -0.826 | -0.642 | -0.660 | -0.435 | -0.293 | -0.392 | -0.237 | -0.160 |
| Afu3g00310 | extracellular phytase, putative                               | -0.633 | -0.637 | -0.666 | -0.372 | -0.253 | -0.174 | -0.534 | -0.196 |
| Afu3g00510 | GPI anchored cell wall protein, putative                      | 0.035  | -0.125 | 0.285  | 0.226  | -0.497 | -0.751 | -0.557 | -0.415 |
| Afu3g00820 | putative exported protein                                     | -1.273 | -0.210 | -0.542 | -0.197 | -0.524 | -0.725 | -0.733 | -0.380 |
| Afu3g00860 | hypothetical protein                                          | -0.331 | -0.542 | -0.469 | -0.606 | -0.644 | -0.214 | -0.644 | -0.528 |

## Down-regulated at 18 or 24h

|            |                                                                        |        |        |        |        |        |        |        |        |
|------------|------------------------------------------------------------------------|--------|--------|--------|--------|--------|--------|--------|--------|
| Afu3g01400 | ABC multidrug transporter, putative                                    | -0.045 | -0.541 | 0.191  | -0.135 | -0.685 | -0.677 | -0.401 | -0.596 |
| Afu3g01450 | 3-methyl-2-oxobutanoate dehydrogenase, putative                        | -0.416 | -0.517 | -0.628 | -0.664 | -0.379 | -0.207 | -0.039 | 0.442  |
| Afu3g01580 | GMC oxidoreductase, putative                                           | -1.562 | -1.950 | -1.300 | -1.363 | -0.386 | -0.090 | -0.333 | -0.195 |
| Afu3g01590 | hypothetical protein                                                   | -0.845 | -1.215 | -0.622 | -0.737 | -0.189 | -0.094 | -0.441 | -0.055 |
| Afu3g01990 | DUF636 domain protein                                                  | -1.113 | -0.062 | -1.050 | -0.594 | -1.174 | -0.960 | -1.155 | -0.927 |
| Afu3g02000 | C6 transcription factor, putative                                      | -2.094 | -0.617 | -2.056 | -1.083 | -1.675 | -1.542 | -1.311 | -1.683 |
| Afu3g02830 | ankyrin repeat protein                                                 | -0.766 | -0.744 | -0.521 | -0.686 | -0.226 | -0.297 | -0.360 | -0.232 |
| Afu3g03280 | FAD binding monooxygenase, putative                                    | -2.349 | -0.922 | -2.076 | -2.523 | -0.828 | -1.094 | -1.330 | -1.885 |
| Afu3g03400 | siderophore biosynthesis acetylase Acel, putative                      | -2.261 | -1.916 | -1.652 | -1.276 | -1.280 | -1.132 | -0.702 | -1.140 |
| Afu3g03410 | enoyl-CoA hydratase/isomerase family protein                           | -2.807 | -1.629 | -2.107 | -1.325 | -1.424 | -1.567 | -0.907 | -1.237 |
| Afu3g03440 | MFS family siderophore transporter, putative                           | -2.499 | -0.323 | -2.392 | -1.141 | -1.110 | -1.374 | -0.593 | -1.528 |
| Afu3g03640 | siderochrome-iron transporter (MirB), putative                         | -2.777 | -0.940 | -2.832 | -1.399 | -1.407 | -1.125 | -1.695 | -1.519 |
| Afu3g03650 | acetyltransferase, GNAT family, putative                               | -2.351 | -0.962 | -1.875 | -1.212 | -0.934 | -0.927 | -0.879 | -0.930 |
| Afu3g05620 | Fot1 family transposase, putative                                      | -0.379 | -0.409 | -0.347 | -0.465 | -0.158 | -0.021 | -0.431 | 0.094  |
| Afu3g06240 | hypothetical protein                                                   | -0.439 | -0.475 | -0.329 | -0.514 | 0.009  | -0.004 | -0.114 | 0.013  |
| Afu3g06250 | hypothetical protein                                                   | -0.528 | -0.573 | -0.429 | -0.462 | -0.057 | -0.157 | 0.026  | 0.062  |
| Afu3g06600 | siroheme synthase, putative                                            | -0.431 | -0.774 | -0.722 | -0.534 | 0.167  | 0.127  | 0.482  | 0.077  |
| Afu3g07300 | ABC multidrug transporter, putative                                    | 0.031  | -0.417 | -0.376 | -0.714 | -0.370 | -0.342 | -0.263 | -0.318 |
| Afu3g07980 | conserved hypothetical protein                                         | -1.141 | -0.769 | -0.915 | -0.510 | -0.187 | 0.066  | -0.304 | -0.236 |
| Afu3g08110 | cell wall protein, putative                                            | -1.762 | -0.515 | -1.754 | -0.851 | -1.045 | -0.742 | -1.483 | -1.273 |
| Afu3g08530 | MFS drug transporter, putative                                         | -0.320 | -0.298 | -0.344 | -0.283 | 0.160  | -0.206 | -0.051 | -0.243 |
| Afu3g08650 | C1-THFS protein                                                        | -1.145 | -0.709 | -1.416 | -0.944 | -0.242 | -0.263 | -0.027 | 0.104  |
| Afu3g09210 | endonuclease/exonuclease/phosphatase family protein                    | NaN    | -0.356 | -0.324 | -0.402 | -0.346 | -0.060 | -0.090 | -0.236 |
| Afu3g09380 | SGT1 protein, putative                                                 | -0.423 | -0.327 | -0.599 | -0.716 | -0.442 | -0.545 | -0.383 | -0.693 |
| Afu3g09660 | hypothetical protein                                                   | -0.934 | -1.006 | -0.750 | -0.551 | 0.071  | 0.142  | -0.186 | 0.225  |
| Afu3g09690 | extracellular thaumatin domain protein, putative                       | 0.149  | 1.128  | 0.255  | 0.643  | -2.404 | -1.651 | -1.652 | -1.008 |
| Afu3g11430 | arginase                                                               | -3.212 | -2.651 | -2.331 | -0.915 | -3.382 | -3.407 | -2.701 | -1.879 |
| Afu3g11700 | ubiquitin C-terminal hydrolase, putative                               | -1.448 | -0.967 | -0.870 | -1.192 | -1.227 | -0.968 | -0.788 | -0.889 |
| Afu3g12100 | trehalose synthase (Ccg-9), putative                                   | -1.280 | -0.870 | -0.904 | -1.045 | -0.281 | -0.291 | -0.310 | -0.446 |
| Afu3g12180 | C6 transcription factor, putative                                      | -1.018 | -1.052 | -0.923 | -0.869 | 0.004  | 0.127  | 0.097  | 0.176  |
| Afu3g12190 | RING finger domain protein, putative                                   | -1.429 | -1.597 | -1.282 | -0.940 | 0.332  | 0.376  | 0.725  | -0.131 |
| Afu3g12330 | phosphatidyl synthase                                                  | -0.794 | 0.454  | -1.308 | -0.572 | -0.932 | -0.700 | -1.103 | -0.978 |
| Afu3g13450 | oxidoreductase, short chain dehydrogenase/reductase family superfamily | -0.116 | 0.310  | -0.197 | 0.190  | -0.352 | -0.396 | -0.379 | -0.296 |
| Afu3g14460 | Rad51 family DNA repair protein, putative                              | -0.368 | -0.463 | -0.321 | -0.339 | 0.254  | -0.062 | -0.192 | 0.030  |
| Afu4g05920 | mitochondrial protein sorting (Msf1), putative                         | -1.640 | -0.171 | -1.239 | -0.723 | -1.160 | -1.339 | -1.056 | -1.844 |
| Afu4g06610 | hypothetical protein                                                   | 0.145  | -0.341 | 0.055  | -0.102 | -0.543 | -0.737 | -0.913 | -0.619 |
| Afu4g06620 | Glutamate/Leucine/Phenylalanine/Valine dehydrogenase, putative         | -3.340 | -1.842 | -2.819 | -2.260 | -1.197 | -1.004 | -2.523 | -2.349 |
| Afu4g06670 | allergen Asp F7                                                        | -0.402 | -0.652 | -0.529 | -0.624 | -0.371 | 0.009  | -0.918 | -0.732 |
| Afu4g06700 | GPI anchored cell wall protein, putative                               | -0.391 | -0.339 | -0.450 | -0.301 | 0.054  | 0.014  | -0.381 | -0.238 |
| Afu4g06760 | ubiquinone biosynthesis protein, putative                              | -1.385 | -0.789 | -1.253 | -1.151 | -0.768 | -1.099 | -0.656 | -1.383 |
| Afu4g06910 | outer mitochondrial membrane protein porin                             | -0.480 | -0.998 | -0.370 | -0.505 | -0.623 | -0.532 | -0.741 | -0.558 |
| Afu4g06940 | Des-1 protein                                                          | -0.489 | -0.330 | -0.546 | -0.529 | -0.115 | -0.117 | -0.269 | -0.169 |
| Afu4g07050 | L-lactate dehydrogenase                                                | -1.185 | -1.074 | -0.883 | -1.274 | -0.342 | -0.795 | -0.210 | -0.838 |
| Afu4g07060 | acyl-CoA thioester hydrolase, putative                                 | -1.758 | -1.748 | -1.585 | -1.929 | -1.042 | -1.394 | -0.916 | -1.661 |
| Afu4g07300 | hypothetical protein                                                   | -1.000 | -1.086 | -1.222 | -0.865 | -0.310 | 0.027  | -1.236 | -0.765 |

## Down-regulated at 18 or 24h

|            |                                                                         |        |        |        |        |        |        |        |        |
|------------|-------------------------------------------------------------------------|--------|--------|--------|--------|--------|--------|--------|--------|
| Afu4g07360 | 5-methyltetrahydropteroyltriglutamate--homocysteine S-methyltransferase | -1.032 | -1.780 | -1.748 | -1.494 | 0.329  | 0.198  | 0.349  | 0.038  |
| Afu4g07810 | L-serine dehydratase, putative                                          | -1.061 | 0.293  | -1.254 | -1.361 | -1.669 | -2.089 | -1.269 | -1.668 |
| Afu4g08710 | short chain dehydrogenase, putative                                     | -2.117 | 0.926  | -1.393 | 0.165  | -0.937 | -1.378 | -1.187 | -0.899 |
| Afu4g09320 | antigenic dipeptidyl-peptidase Dpp4                                     | -0.738 | -0.791 | -1.012 | -0.535 | -0.285 | 0.016  | -0.245 | 0.169  |
| Afu4g09350 | hypothetical protein                                                    | -2.349 | -2.065 | -2.089 | -1.723 | -1.454 | -1.403 | -2.004 | -1.782 |
| Afu4g09360 | ATP synthase proteolipid P2, putative                                   | -2.440 | -2.315 | -2.068 | -1.752 | -1.545 | -1.607 | -1.987 | -1.855 |
| Afu4g09560 | ZIP Zinc transporter, putative                                          | -0.403 | -0.428 | -0.390 | -0.349 | -0.262 | 0.127  | -0.524 | -0.247 |
| Afu4g09960 | conserved hypothetical protein                                          | -1.348 | -0.432 | -1.175 | -0.963 | -0.639 | -0.941 | -0.546 | -1.088 |
| Afu4g10120 | C6 finger domain protein, putative                                      | -1.149 | -0.745 | -0.829 | -0.639 | -1.734 | -0.933 | -0.806 | 0.188  |
| Afu4g10410 | aspartate aminotransferase, putative                                    | -1.542 | -1.884 | -1.101 | -1.452 | -1.064 | -0.746 | -1.187 | -1.097 |
| Afu4g10990 | transporter protein smf2                                                | -0.714 | -0.779 | -0.568 | -0.908 | -0.569 | -0.796 | -0.963 | -0.550 |
| Afu4g11310 | fructose-1,6-bisphosphatase                                             | -2.150 | -1.492 | -1.976 | -2.677 | -1.384 | -1.311 | -0.737 | -2.193 |
| Afu4g11680 | conserved hypothetical protein                                          | -0.458 | -0.436 | -0.330 | -0.321 | -0.159 | 0.039  | -0.351 | -0.075 |
| Afu4g11720 | phosphatidyl synthase                                                   | -1.529 | -1.706 | -1.713 | -1.226 | -1.909 | -1.539 | -2.535 | -2.243 |
| Afu4g12440 | sulfate transporter family protein                                      | -1.762 | -1.116 | -1.393 | -0.667 | -1.104 | -0.959 | -1.138 | -0.844 |
| Afu4g13510 | isocitrate lyase                                                        | -1.973 | 1.006  | -1.578 | -0.808 | -1.968 | -2.074 | -1.542 | -2.067 |
| Afu4g14060 | conserved hypothetical protein                                          | -1.263 | -0.549 | -0.930 | -1.305 | -1.169 | -1.209 | -1.635 | -0.897 |
| Afu4g14090 | UDP-glucose 4-epimerase                                                 | -0.430 | -0.313 | -0.316 | -0.379 | -0.194 | 0.011  | -0.556 | -0.307 |
| Afu4g14230 | MFS transporter, putative                                               | -1.393 | -1.446 | -1.181 | -0.984 | 0.142  | -0.302 | -0.189 | -0.288 |
| Afu4g14240 | O-methyltransferase                                                     | -1.937 | -1.363 | -1.405 | -0.670 | NaN    | NaN    | NaN    | NaN    |
| Afu4g14450 | D-mannonate oxidoreductase                                              | -0.195 | 1.890  | -0.391 | 0.376  | -0.881 | -0.866 | -0.944 | -1.278 |
| Afu5g00550 | endoglycoceramidase, putative                                           | -0.696 | -1.206 | -0.661 | -0.788 | -0.483 | -0.110 | -0.884 | -0.417 |
| Afu5g00770 | integral membrane protein, putative                                     | -0.393 | -0.609 | -0.558 | -0.413 | 0.296  | 0.291  | -0.085 | -0.157 |
| Afu5g02470 | thiamine biosynthesis protein (Nmt1), putative                          | -1.744 | -1.638 | -1.353 | -1.718 | -1.207 | -0.782 | -1.247 | -0.841 |
| Afu5g02820 | hypothetical protein                                                    | -1.531 | -2.131 | -1.623 | -1.407 | -0.441 | 0.129  | -0.744 | -0.393 |
| Afu5g02840 | sugar transporter family protein, putative                              | -1.099 | -0.977 | -1.336 | -0.983 | -0.299 | -0.339 | -0.415 | -0.199 |
| Afu5g02850 | conserved hypothetical protein                                          | -1.006 | -1.293 | -1.174 | -1.050 | -0.324 | -0.283 | -0.058 | -0.028 |
| Afu5g02860 | integral membrane protein, putative                                     | -0.723 | -1.602 | -1.184 | -0.928 | -0.126 | -0.087 | 0.009  | 0.095  |
| Afu5g02950 | conserved hypothetical protein                                          | -0.806 | -1.204 | -0.753 | -0.667 | 0.237  | -0.375 | -0.102 | -0.346 |
| Afu5g02960 | hypothetical protein                                                    | -0.665 | -1.048 | -0.663 | -0.613 | 0.216  | -0.303 | -0.032 | -0.238 |
| Afu5g03030 | C6 transcription factor, putative                                       | -0.802 | -1.154 | -0.724 | -0.890 | -0.184 | -0.265 | -0.360 | -0.306 |
| Afu5g03760 | class III chitinase ChiA1                                               | -0.703 | -1.076 | -0.695 | -0.976 | -0.523 | 0.135  | -1.737 | -0.832 |
| Afu5g03800 | high-affinity iron permease CaFTR2                                      | -2.083 | -0.931 | -1.612 | -1.275 | 0.100  | -1.029 | -0.335 | -1.373 |
| Afu5g03920 | bZIP transcription factor (HapX), putative                              | -1.918 | -0.792 | -1.892 | -1.479 | -0.840 | -1.214 | -0.645 | -1.576 |
| Afu5g03930 | alcohol dehydrogenase, putative                                         | -2.047 | -1.323 | -1.824 | -1.969 | -1.206 | -1.768 | -1.193 | -1.992 |
| Afu5g04220 | mitochondrial DNA replication protein (Yhm2), putative                  | -1.105 | -1.464 | -1.278 | -1.175 | -1.139 | -0.996 | -1.359 | -1.431 |
| Afu5g04230 | citrate synthase, eukaryotic                                            | -0.708 | -0.685 | -0.487 | -0.440 | -0.635 | -0.568 | -0.806 | -1.097 |
| Afu5g04250 | homocysteine synthase, putative                                         | -1.871 | -0.907 | -2.019 | -1.636 | -0.241 | -0.511 | -0.142 | -0.391 |
| Afu5g06240 | alcohol dehydrogenase, putative                                         | -2.194 | -2.242 | -1.565 | -1.279 | NaN    | NaN    | NaN    | NaN    |
| Afu5g07480 | hypothetical protein                                                    | -0.751 | -0.807 | -0.477 | -0.517 | -0.013 | 0.031  | -0.165 | -0.050 |
| Afu5g07490 | steroid monooxygenase [imported]                                        | -0.499 | -0.545 | -0.309 | -0.473 | -0.053 | 0.024  | NaN    | 0.088  |
| Afu5g07630 | ubiE/COQ5 methyltransferase, putative                                   | -0.539 | -0.814 | -0.508 | -0.743 | -0.537 | -0.414 | -1.557 | -0.944 |
| Afu5g08210 | dolichyl-phosphate beta-glucosyltransferase, putative                   | -0.680 | -0.517 | -0.371 | -0.681 | -0.267 | -0.231 | -0.295 | -0.429 |
| Afu5g08770 | hypothetical protein                                                    | -0.752 | -0.477 | -0.736 | -0.726 | -0.583 | -0.130 | -1.117 | -0.219 |
| Afu5g09520 | conserved hypothetical protein                                          | -0.556 | -1.199 | -0.448 | -0.780 | -0.880 | -0.801 | -0.804 | -0.682 |



## Down-regulated at 18 or 24h

|            |                                                                      |        |        |        |        |        |        |        |        |
|------------|----------------------------------------------------------------------|--------|--------|--------|--------|--------|--------|--------|--------|
| Afu5g10650 | pyridoxamine phosphate oxidase, putative                             | -0.773 | -0.926 | -0.564 | -0.696 | -0.348 | -0.278 | -0.060 | -0.146 |
| Afu5g10660 | pentatricopeptide repeat protein                                     | -3.029 | -1.744 | -2.471 | -2.131 | -1.632 | -1.736 | -1.739 | -2.417 |
| Afu5g10950 | hypothetical protein                                                 | -0.583 | -0.581 | -0.446 | -0.421 | -0.051 | -0.117 | -0.161 | 0.210  |
| Afu5g10960 | conserved hypothetical protein                                       | -0.548 | -0.350 | -0.456 | -0.382 | -0.232 | -0.211 | -0.131 | -0.102 |
| Afu5g11320 | thioredoxin, putative                                                | -0.695 | -0.562 | -0.740 | -0.492 | 0.080  | -0.035 | -0.107 | -0.032 |
| Afu5g11630 | hypothetical protein                                                 | -0.391 | -0.478 | -0.391 | -0.414 | -0.100 | -0.237 | -0.117 | -0.469 |
| Afu5g14330 | CPRD8 protein                                                        | -0.911 | -0.935 | -0.857 | -0.672 | 0.091  | NaN    | NaN    | -1.010 |
| Afu5g14340 | oxidoreductase, short-chain dehydrogenase/reductase family, putative | -1.186 | -0.744 | -1.085 | -0.654 | -0.234 | -0.245 | -0.779 | -0.405 |
| Afu5g14650 | RING finger protein                                                  | -1.344 | -0.862 | -1.017 | -0.787 | -0.633 | -0.578 | -1.226 | -0.923 |
| Afu5g14660 | GABA permease, putative                                              | -1.185 | -0.871 | -0.950 | -0.802 | -0.743 | -0.458 | -1.197 | -0.903 |
| Afu5g14680 | hypothetical protein                                                 | -3.575 | -1.995 | -2.501 | -1.602 | -0.525 | -0.916 | -2.174 | -1.420 |
| Afu5g14690 | phosphorylase, putative                                              | -0.846 | -0.652 | -0.851 | -0.705 | -0.263 | 0.051  | -0.217 | -0.139 |
| Afu5g14930 | conserved hypothetical protein                                       | -0.283 | 0.545  | -0.351 | 0.176  | -0.815 | -0.679 | -0.787 | -0.644 |
| Afu6g00270 | conserved hypothetical protein                                       | -0.342 | -0.303 | -0.305 | -0.276 | -0.277 | -0.008 | -0.301 | -0.051 |
| Afu6g02280 | allergen Asp F3                                                      | -0.629 | -0.447 | -0.597 | -0.442 | -0.460 | -0.167 | -0.605 | -0.301 |
| Afu6g02470 | fumarate hydratase, putative                                         | -1.293 | -1.460 | -0.975 | -1.225 | -0.678 | -0.676 | -0.529 | -0.553 |
| Afu6g02480 | esterase, putative                                                   | -0.604 | -0.850 | -0.553 | -0.659 | -0.753 | -0.423 | -0.924 | -0.435 |
| Afu6g02500 | Null                                                                 | -0.400 | -0.556 | -0.401 | -0.358 | -0.139 | -0.018 | -0.367 | -0.005 |
| Afu6g02690 | C2H2 finger domain protein, putative                                 | -0.469 | -0.493 | -0.377 | -0.403 | -0.570 | -0.150 | -0.725 | -0.410 |
| Afu6g03530 | glutamine synthetase                                                 | -1.083 | -0.695 | -0.926 | -1.170 | -0.666 | -0.541 | -0.634 | -0.416 |
| Afu6g03540 | malate synthase A                                                    | -1.522 | -0.030 | -1.300 | -0.971 | -0.971 | -0.719 | NaN    | -1.164 |
| Afu6g03670 | biotin synthase, putative                                            | -0.323 | -0.361 | -0.373 | -0.411 | -0.263 | 0.107  | -0.610 | -0.092 |
| Afu6g04820 | para-aminobenzoate synthase PabaA                                    | -0.846 | -1.072 | -0.807 | -0.741 | -0.153 | -0.225 | -0.298 | -0.326 |
| Afu6g04920 | NAD-dependent formate dehydrogenase                                  | -1.512 | -1.108 | -1.271 | -0.677 | -0.289 | -0.416 | 0.352  | 0.172  |
| Afu6g05080 | ABC transporter, putative                                            | -1.260 | -1.158 | -1.051 | -0.872 | -0.278 | -0.111 | -0.217 | 0.016  |
| Afu6g06800 | peptidase, putative                                                  | -0.574 | -0.822 | -0.997 | -0.633 | -0.266 | -0.090 | 0.450  | 0.114  |
| Afu6g06840 | hypothetical protein                                                 | -1.252 | -1.399 | -1.147 | -1.367 | -0.505 | -0.399 | -0.525 | -0.753 |
| Afu6g07720 | phosphoenolpyruvate carboxykinase (ATP)                              | -3.872 | -3.849 | -3.872 | -5.113 | -3.878 | -4.419 | -3.466 | -4.346 |
| Afu6g07770 | alanine aminotransferase, putative                                   | -1.858 | -1.610 | -1.386 | -1.559 | -1.171 | -1.095 | -1.073 | -1.206 |
| Afu6g07780 | Copper fist DNA binding domain protein                               | -0.537 | -0.386 | -0.705 | -0.518 | -0.487 | -0.290 | -0.100 | -0.345 |
| Afu6g07790 | hypothetical protein                                                 | -0.222 | -0.225 | -0.288 | -0.295 | -0.330 | -0.275 | -0.329 | -0.344 |
| Afu6g07900 | carbon catabolite repression protein CreD, putative                  | -1.668 | -1.019 | -1.327 | -1.290 | -0.572 | -0.754 | -0.571 | -1.288 |
| Afu6g08360 | thiazole biosynthesis enzyme                                         | -1.124 | -0.977 | -1.224 | -1.393 | -0.887 | -0.621 | -0.967 | -0.972 |
| Afu6g08470 | glycerol kinase, putative                                            | -0.854 | 0.115  | -0.979 | -0.909 | -1.183 | -1.265 | -0.894 | -0.888 |
| Afu6g08630 | hypothetical protein                                                 | -0.651 | -0.906 | -0.550 | -0.540 | -0.531 | -0.568 | -0.767 | -0.684 |
| Afu6g08750 | delta-1-pyrroline-5-carboxylate dehydrogenase                        | -2.282 | -1.449 | -2.109 | -1.198 | -1.861 | -1.515 | -1.948 | -0.650 |
| Afu6g08760 | proline oxidase                                                      | -2.754 | -1.525 | -2.538 | -1.214 | -2.046 | -1.476 | -2.411 | -0.495 |
| Afu6g08850 | ubiquinone biosynthesis methyltransferase Coq5, putative             | -1.071 | -0.720 | -0.776 | -0.840 | -0.377 | -0.401 | -0.644 | -0.759 |
| Afu6g08920 | assimilatory sulfite reductase                                       | -1.002 | -0.753 | -1.065 | -0.577 | 0.648  | 0.218  | 0.738  | -0.044 |
| Afu6g10450 | hypothetical protein                                                 | -0.918 | -0.797 | -0.974 | -0.547 | -0.397 | -0.144 | -0.585 | -0.204 |
| Afu6g11100 | basic amino acid transporter, putative                               | -1.237 | -0.773 | -0.949 | -0.659 | 0.148  | -0.280 | NaN    | -0.155 |
| Afu6g11200 | DENN (AEX-3) domain protein                                          | -0.387 | -0.601 | -0.440 | -0.515 | -0.070 | -0.028 | -0.333 | -0.169 |
| Afu6g12200 | hypothetical protein                                                 | -1.016 | -0.602 | -0.805 | -0.758 | -0.480 | -0.434 | -0.397 | -0.434 |
| Afu6g12880 | hypothetical protein                                                 | -0.310 | -0.266 | -0.361 | -0.311 | -0.311 | 0.006  | -0.669 | -0.402 |
| Afu6g13140 | 3,4-dihydroxy-2-butanone 4-phosphate synthase                        | -0.746 | -0.945 | -0.712 | -0.768 | -0.354 | -0.482 | -0.593 | -0.706 |

## Down-regulated at 18 or 24h

|            |                                                                     |        |        |        |        |        |        |        |        |
|------------|---------------------------------------------------------------------|--------|--------|--------|--------|--------|--------|--------|--------|
| Afu6g13790 | monooxygenase                                                       | -1.896 | -2.546 | -1.337 | -1.793 | 0.011  | -0.606 | NaN    | -0.794 |
| Afu6g14060 | hypothetical protein                                                | -0.556 | -0.679 | -0.506 | -0.428 | -0.005 | -0.033 | -0.351 | -0.640 |
| Afu6g14530 | L-cystine transporter, putative                                     | -1.794 | -1.817 | -1.847 | -1.698 | -0.992 | -1.476 | -1.473 | -1.522 |
| Afu7g01010 | alcohol dehydrogenase, putative                                     | -1.525 | -0.905 | NaN    | -0.772 | -0.364 | 0.248  | NaN    | NaN    |
| Afu7g04730 | siderochrome-iron transporter, putative                             | -2.308 | -0.518 | -1.482 | -0.821 | -0.930 | -0.870 | -0.677 | -1.006 |
| Afu7g04930 | alkaline serine protease (PR1), putative                            | -0.864 | -0.496 | -0.571 | -0.842 | 0.142  | -0.081 | 0.184  | 0.277  |
| Afu7g05060 | MgtC/SapB family membrane protein                                   | -1.923 | -2.113 | NaN    | NaN    | NaN    | NaN    | NaN    | NaN    |
| Afu7g05450 | SUN domain protein (Uth1), putative                                 | -0.754 | -0.590 | -0.732 | -0.567 | 0.020  | 0.317  | -0.255 | -0.027 |
| Afu7g05500 | theta class glutathione S-transferase                               | -1.628 | -0.122 | -0.863 | -0.756 | -0.446 | -0.650 | -0.607 | -0.538 |
| Afu7g05710 | hypothetical protein                                                | -0.723 | -0.567 | -0.554 | -0.430 | -0.332 | -0.263 | -0.488 | -0.633 |
| Afu7g05800 | fructose-2,6-bisphosphatase                                         | -0.732 | -0.590 | -0.564 | -0.681 | -0.644 | -0.608 | -0.117 | -0.806 |
| Afu7g05880 | hypothetical protein                                                | -0.628 | -0.763 | -0.681 | -0.633 | 0.078  | 0.010  | -0.069 | -0.138 |
| Afu7g06060 | siderochrome-iron transporter (Sit1), putative                      | -1.738 | -0.142 | -1.644 | -0.957 | -1.052 | -0.803 | -1.061 | -1.373 |
| Afu7g06100 | acyl-coenzyme A oxidase I, peroxisomal, component A                 | -0.241 | -0.736 | -0.316 | -0.513 | -0.686 | -0.371 | -0.542 | -0.428 |
| Afu7g06780 | hypothetical protein                                                | -0.977 | -0.597 | -0.704 | -0.671 | -1.804 | -0.708 | -2.538 | -1.447 |
| Afu7g07090 | zinc knuckle domain protein                                         | -0.899 | 0.326  | -0.579 | 0.093  | -0.372 | -0.462 | -0.693 | -0.587 |
| Afu7g08660 | Fot1 family transposase, putative                                   | -0.384 | -0.384 | -0.342 | -0.535 | -0.189 | -0.038 | -0.461 | 0.078  |
| Afu8g01070 | Lathosterol oxidase, putative                                       | -0.573 | -0.817 | -0.631 | -0.531 | -0.082 | -0.215 | -0.423 | -0.068 |
| Afu8g01730 | Glycosyl transferase family 8 domain containing protein             | -1.197 | -0.713 | -1.138 | -1.126 | -0.404 | -0.565 | -0.728 | -0.780 |
| Afu8g02100 | beta-glucosidase, putative                                          | -0.431 | -0.512 | -0.574 | -0.345 | -0.379 | -0.333 | 0.008  | -0.163 |
| Afu8g02190 | hypothetical protein                                                | -1.036 | -1.337 | -0.683 | -0.772 | -0.023 | 0.108  | NaN    | 0.199  |
| Afu8g04370 | GPI anchored protein, putative                                      | -0.726 | -0.569 | -0.904 | -0.482 | -0.404 | -0.210 | -1.068 | -0.807 |
| Afu8g04630 | C4-dicarboxylate transporter/malic acid transport protein, putative | -1.472 | -0.944 | -1.525 | -1.579 | -0.526 | -0.333 | -1.289 | -0.916 |
| Afu8g05610 | cell wall glucanase (Scw11), putative                               | -0.957 | -0.860 | -0.925 | -0.608 | -0.087 | 0.217  | -0.497 | -0.276 |
| Afu8g05850 | FAD dependent oxidoreductase superfamily                            | -0.848 | -0.878 | -0.565 | -0.488 | -0.020 | 0.244  | -0.583 | -0.036 |
| Afu8g05970 | TRI7, putative                                                      | NaN    | -1.008 | -0.952 | NaN    | NaN    | NaN    | NaN    | NaN    |
| Afu8g06020 | glutamate decarboxylase                                             | -0.740 | -0.677 | -0.565 | -0.424 | -0.105 | -0.140 | -0.308 | 0.155  |
| Afu8g06360 | alpha-1,3-glucanase, putative                                       | NaN    | NaN    | NaN    | -0.377 | -0.103 | 0.195  | NaN    | -0.156 |
| Afu8g07130 | AhpC/TSA family thioredoxin peroxidase, putative                    | -0.869 | -0.606 | -1.154 | -0.906 | 0.010  | 0.139  | -0.726 | -0.302 |

## Up-regulated at 18 or 24h

| Locus      | Comm_Name                                                     | Genes up-regulated in the acuM deletion mutant (Log2 values) |          |            |            |          |          |            |            |
|------------|---------------------------------------------------------------|--------------------------------------------------------------|----------|------------|------------|----------|----------|------------|------------|
|            |                                                               | 18 h WT1                                                     | 18 h WT2 | 18 h Comp1 | 18 h Comp2 | 24 h WT1 | 24 h WT2 | 24 h Comp1 | 24 h Comp2 |
| Afu1g01690 | cytochrome P450 alkane hydroxylase, putative                  | 0.487                                                        | -0.118   | 0.189      | -0.041     | 0.876    | 0.822    | 0.970      | 0.730      |
| Afu1g01800 | MFS transporter, putative                                     | 1.422                                                        | 0.579    | 0.785      | 0.373      | 0.883    | 0.733    | 1.349      | 1.025      |
| Afu1g02410 | AAA family ATPase Reptin, putative                            | 0.389                                                        | 0.378    | 0.414      | 0.409      | -0.002   | 0.064    | -0.001     | 0.007      |
| Afu1g02600 | hypothetical protein                                          | 0.461                                                        | 0.578    | 0.556      | 0.411      | 0.473    | 0.336    | 0.328      | 0.248      |
| Afu1g02770 | hypothetical protein                                          | 2.139                                                        | 2.757    | 1.772      | 1.258      | 1.343    | 0.990    | 1.479      | 1.681      |
| Afu1g02890 | dUTPase (Dut), putative                                       | 0.725                                                        | 0.534    | 0.638      | 0.557      | -0.059   | 0.044    | -0.056     | 0.043      |
| Afu1g03910 | hypothetical protein                                          | 0.544                                                        | 0.408    | 0.516      | 0.388      | 0.287    | 0.089    | 0.201      | 0.187      |
| Afu1g04560 | urease, putative                                              | 0.799                                                        | 0.306    | 0.141      | 0.101      | 0.789    | 0.709    | 0.651      | 0.665      |
| Afu1g05610 | protein phosphotase 2a 65kd regulatory subunit                | 0.510                                                        | -0.014   | 0.481      | 0.076      | 0.332    | 0.409    | 0.393      | 0.313      |
| Afu1g07200 | mitochondrial cytochrome b2, putative                         | 0.578                                                        | 0.438    | 0.515      | 0.361      | 0.324    | 0.652    | 0.322      | 0.611      |
| Afu1g07430 | hypothetical protein                                          | 1.898                                                        | 1.051    | 1.558      | 0.697      | 0.451    | 0.353    | 0.445      | 0.353      |
| Afu1g09580 | conserved hypothetical protein                                | 0.659                                                        | 0.740    | 0.477      | 0.760      | 0.206    | 0.112    | 0.674      | 0.066      |
| Afu1g10580 | homeobox transcription factor, putative                       | 1.371                                                        | 1.237    | 1.100      | 0.684      | 0.122    | 0.265    | 0.222      | 0.198      |
| Afu1g11000 | C6 transcription factor, putative                             | 0.291                                                        | NaN      | 0.316      | 0.273      | 0.032    | 0.066    | 0.122      | 0.278      |
| Afu1g11190 | eukaryotic translation elongation factor eEF-1 beta, putative | 0.578                                                        | 0.763    | 0.661      | 0.486      | 0.258    | 0.011    | 0.262      | -0.031     |
| Afu1g15490 | MFS multidrug transporter, putative                           | 1.275                                                        | 0.930    | 0.787      | 0.799      | 0.133    | 0.043    | 0.062      | -0.571     |
| Afu1g15870 | DNA topoisomerase IV subunit A, putative                      | 0.350                                                        | 0.339    | 0.450      | 0.363      | 0.277    | -0.071   | 0.282      | 0.437      |
| Afu1g16250 | alpha-glucosidase B                                           | 2.870                                                        | 2.691    | 2.267      | 1.585      | 0.891    | 0.819    | 1.109      | 1.099      |
| Afu1g17470 | high affinity nitrate transporter NrtB                        | 2.662                                                        | NaN      | 1.541      | NaN        | 1.531    | 2.221    | 1.259      | 0.969      |
| Afu1g17480 | conserved hypothetical protein                                | 0.701                                                        | -0.099   | 0.817      | -0.041     | 0.650    | 0.861    | 0.553      | 0.590      |
| Afu2g00540 | carboxyphosphoenolpyruvate phosphonmutase, putative           | 0.973                                                        | -0.398   | 1.107      | -1.144     | 1.449    | 1.520    | 0.904      | 0.698      |
| Afu2g00960 | NACHT and Ankyrin domain protein                              | 2.901                                                        | 1.753    | 1.757      | 1.081      | 0.473    | 0.550    | 0.364      | 0.625      |
| Afu2g02080 | C2H2 finger domain protein, putative                          | 1.071                                                        | 1.197    | 0.786      | 1.053      | 0.071    | -0.250   | -0.026     | -0.704     |
| Afu2g02250 | allantoinase                                                  | 0.681                                                        | 1.099    | 0.736      | 0.717      | 0.798    | 0.507    | 0.840      | 0.580      |
| Afu2g02660 | DNA topoisomerase III, putative                               | NaN                                                          | -0.357   | 0.324      | 0.261      | 0.395    | 0.313    | 0.413      | 0.372      |
| Afu2g03230 | alpha-amylase AmyA                                            | 1.156                                                        | 0.310    | 0.793      | 0.167      | 0.525    | 0.357    | 0.506      | 0.582      |
| Afu2g07400 | mitochondrial carrier protein, putative                       | 0.410                                                        | 0.337    | 0.415      | 0.338      | 0.054    | -0.032   | 0.065      | 0.049      |
| Afu2g07970 | ribosomal protein L19                                         | 0.540                                                        | 0.390    | 0.531      | 0.641      | -0.047   | 0.038    | -0.205     | -0.281     |
| Afu2g10230 | myo-inositol oxygenase                                        | 2.943                                                        | 3.779    | 1.190      | 1.605      | 0.412    | 0.368    | 0.532      | 0.463      |
| Afu2g11270 | alpha-1,3-glucan synthase, putative                           | 1.867                                                        | 1.919    | 1.650      | 1.559      | 0.054    | 0.294    | 0.143      | 0.090      |
| Afu2g14750 | endo-arabinase, putative                                      | 2.975                                                        | 3.153    | 1.950      | 1.812      | 0.245    | 0.395    | 0.595      | 0.677      |
| Afu2g15390 | flug protein                                                  | 0.939                                                        | 0.997    | 0.633      | 0.631      | 0.009    | -0.107   | -0.041     | -0.086     |
| Afu2g17530 | conidial pigment biosynthesis oxidase Arb2/brown2             | 2.509                                                        | 1.751    | 2.317      | 1.228      | 0.106    | -0.252   | 0.122      | 0.035      |
| Afu2g17540 | pigment biosynthesis oxidase Abr1/brown 1                     | 2.651                                                        | 2.544    | 1.966      | 1.796      | 0.063    | -0.332   | 0.073      | 0.088      |
| Afu2g17580 | conidial pigment biosynthesis scytalone dehydratase Arp1      | 2.799                                                        | 1.986    | 2.217      | 1.307      | 0.205    | -0.090   | 0.167      | 0.280      |
| Afu2g18000 | short chain dehydrogenase, putative                           | 1.235                                                        | 1.410    | 1.123      | 0.768      | 0.378    | -0.674   | 0.325      | 0.112      |
| Afu2g18030 | catalase, putative                                            | 2.168                                                        | 2.649    | 1.981      | 1.828      | 0.020    | -0.246   | 0.339      | 0.274      |
| Afu3g02340 | CBF/NF-Y family transcription factor, putative                | 0.753                                                        | 0.557    | 0.605      | 0.562      | 0.320    | 0.003    | 0.308      | -0.024     |
| Afu3g05520 | oxysterol binding protein (Orp8), putative                    | 0.412                                                        | 0.454    | 0.342      | 0.360      | -0.057   | -0.038   | 0.089      | 0.069      |
| Afu3g05530 | condensin complex component cnd1                              | 0.420                                                        | 0.111    | 0.450      | 0.036      | 0.414    | 0.425    | 0.451      | 0.455      |
| Afu3g06760 | ribosomal protein L37                                         | 0.601                                                        | 0.479    | 0.563      | 0.804      | 0.021    | -0.144   | -0.317     | -0.372     |
| Afu3g08040 | polymerase (RNA) II (DNA directed) polypeptide D              | 0.699                                                        | 0.473    | 0.655      | 0.373      | 1.221    | 1.068    | 0.888      | 0.806      |
| Afu3g08050 | C6 transcription factor (OTam), putative                      | 0.029                                                        | -0.314   | 0.074      | -0.228     | 0.585    | 0.503    | 0.389      | 0.477      |

## Up-regulated at 18 or 24h

|            |                                                            |        |        |        |        |        |        |        |        |
|------------|------------------------------------------------------------|--------|--------|--------|--------|--------|--------|--------|--------|
| Afu3g10080 | serine/threonine protein kinase, putative                  | 0.406  | 0.479  | 0.488  | 0.352  | 0.126  | -0.024 | 0.201  | 0.136  |
| Afu3g12220 | ABC transporter, putative                                  | 1.412  | 1.083  | 1.173  | 0.849  | 0.373  | 0.496  | 0.689  | 0.153  |
| Afu3g12230 | hypothetical protein                                       | 2.024  | 1.593  | 1.282  | 1.150  | 0.391  | -0.064 | 0.637  | 0.067  |
| Afu3g12710 | conserved hypothetical protein                             | 0.538  | 0.483  | 0.538  | 0.380  | 0.297  | 0.093  | 0.548  | 0.378  |
| Afu3g13090 | hypothetical protein                                       | 1.652  | 1.335  | 1.147  | 0.770  | 0.383  | 0.202  | 0.597  | 0.461  |
| Afu3g13210 | protein kinase domain-containing protein                   | 1.319  | 1.101  | 1.164  | 0.633  | 0.423  | 0.289  | 0.392  | 0.636  |
| Afu4g00210 | polyketide synthase, putative                              | 2.934  | 3.001  | 2.594  | 2.035  | 0.544  | 0.258  | 1.052  | 0.473  |
| Afu4g00230 | oxidoreductase, 2OG-Fe(II) oxygenase family, putative      | 2.074  | 2.129  | 2.082  | 1.922  | 0.336  | 0.255  | 0.782  | 0.394  |
| Afu4g00510 | hypothetical protein                                       | 2.408  | 2.024  | 1.813  | 1.698  | 0.336  | -0.114 | 0.418  | 0.139  |
| Afu4g06880 | conserved hypothetical protein                             | 2.758  | 3.311  | 2.109  | 1.783  | 0.405  | 0.140  | 0.736  | 0.210  |
| Afu4g10070 | class I alpha-mannosidase                                  | 0.763  | 0.825  | 0.473  | 0.284  | 0.341  | 0.358  | 0.293  | 0.377  |
| Afu4g10130 | alpha-amylase (Amy1), putative                             | 2.839  | 1.289  | 2.221  | 0.835  | 1.383  | 0.951  | 1.698  | 1.256  |
| Afu4g10140 | glucoamylase                                               | 2.614  | 2.134  | 1.815  | 1.325  | 0.666  | 0.552  | 1.057  | 1.030  |
| Afu4g10150 | alpha-glucosidase                                          | 4.558  | 3.210  | 3.396  | 2.734  | 1.656  | 1.562  | 1.476  | 1.211  |
| Afu4g12520 | hypothetical protein                                       | 0.954  | 0.200  | 0.871  | 0.104  | 0.497  | 0.430  | 0.554  | 0.533  |
| Afu4g13530 | Trehalase                                                  | 0.452  | 0.507  | 0.476  | 0.482  | 0.004  | -0.139 | 0.211  | -0.031 |
| Afu4g14530 | glutathione S-transferase, putative                        | 1.924  | 1.535  | 1.395  | 0.989  | 0.199  | -0.238 | 0.243  | -0.010 |
| Afu4g14770 | squalene-hopene-cyclase, putative                          | 2.545  | 0.899  | 2.009  | 0.400  | 0.731  | 0.622  | 1.013  | 1.177  |
| Afu4g14840 | transferase family protein                                 | 1.527  | NaN    | 0.575  | NaN    | 0.676  | 0.636  | 0.833  | 1.118  |
| Afu4g14850 | extracellular 3-ketosteroid 1-dehydrogenase, putative      | 1.801  | 0.519  | 0.820  | 0.544  | 0.835  | 0.523  | 0.948  | 0.938  |
| Afu5g01420 | conserved hypothetical protein                             | 1.785  | 0.524  | 1.164  | 0.340  | 1.041  | 0.592  | 0.646  | 0.660  |
| Afu5g01490 | hypothetical protein                                       | 1.773  | 1.545  | 1.365  | 1.104  | 0.165  | -0.301 | 0.249  | 0.128  |
| Afu5g01580 | oxidoreductase, short chain dehydrogenase/reductase family | 0.775  | 0.572  | 0.578  | 0.435  | -0.061 | 0.237  | 0.062  | 0.433  |
| Afu5g02520 | DNA replication licensing factor Mcm5, putative            | 0.628  | 0.615  | 0.509  | 0.483  | 0.417  | 0.331  | 0.383  | 0.071  |
| Afu5g02770 | hypothetical protein                                       | 2.011  | 2.038  | 1.650  | 1.081  | 0.553  | 0.280  | 0.879  | 0.450  |
| Afu5g03280 | hypothetical protein                                       | 1.456  | 0.000  | 1.156  | -0.110 | 0.712  | 0.422  | 0.502  | 0.609  |
| Afu5g06230 | gaba-specific permease                                     | 0.156  | -0.576 | 0.330  | -0.270 | 0.372  | 0.410  | 0.506  | 0.442  |
| Afu5g06290 | MFS transporter, putative                                  | 1.199  | 0.734  | 0.505  | 0.690  | 0.715  | 0.463  | 0.929  | 0.714  |
| Afu5g06610 | glutathione synthetase                                     | -0.068 | -1.667 | -0.206 | -0.216 | 0.500  | 0.505  | 0.616  | 0.452  |
| Afu5g06680 | 4-aminobutyrate aminotransferase                           | 0.713  | 1.025  | 0.901  | 0.592  | 0.211  | 0.138  | 0.778  | 0.547  |
| Afu5g07360 | peroxisomal copper amine oxidase                           | 1.156  | 0.697  | 1.235  | NaN    | 0.546  | 0.521  | 0.538  | 0.636  |
| Afu5g08180 | hypothetical protein                                       | 3.400  | 2.853  | 2.491  | 1.980  | 1.026  | 0.526  | 0.999  | 0.622  |
| Afu5g10890 | DNA replication licensing factor Mcm6, putative            | 0.584  | 0.559  | 0.475  | 0.428  | 0.152  | 0.466  | 0.400  | 0.158  |
| Afu5g11020 | ammonium transporter                                       | 2.385  | 0.523  | 2.164  | 0.604  | 1.607  | 1.466  | 1.637  | 1.547  |
| Afu5g11600 | CRO1 protein                                               | 1.220  | 1.562  | 1.152  | 0.795  | 0.572  | 0.300  | 0.809  | 0.264  |
| Afu5g14850 | conserved hypothetical protein                             | 1.506  | 1.966  | 1.026  | 1.274  | 0.111  | 0.131  | 0.726  | 0.426  |
| Afu6g00770 | extracellular arabinanase, putative                        | 2.590  | 2.045  | 1.810  | 1.185  | -0.456 | -0.202 | -0.471 | 0.044  |
| Afu6g02450 | ribosomal S30/ubiquitin fusion                             | 0.538  | 0.527  | 0.538  | 0.687  | 0.021  | 0.013  | -0.240 | -0.271 |
| Afu6g03060 | monosaccharide transporter                                 | 2.227  | 2.739  | 1.519  | 1.539  | 0.714  | 1.473  | 0.246  | 0.719  |
| Afu6g03510 | polyamine oxidase, putative                                | 0.805  | 0.452  | 0.562  | 0.845  | 0.957  | 0.893  | 1.206  | 1.329  |
| Afu6g03870 | hypothetical protein                                       | 2.884  | 2.930  | 2.153  | 1.800  | 0.712  | 0.327  | 0.792  | 0.630  |
| Afu6g03880 | hypothetical protein                                       | 2.600  | 2.383  | 1.922  | 1.271  | 0.643  | 0.406  | 0.836  | 0.643  |
| Afu6g06530 | hypothetical protein                                       | 1.724  | 1.457  | 1.641  | 1.256  | 0.222  | 0.216  | 0.735  | 0.848  |
| Afu6g06580 | Eukaryotic phosphomannomutase                              | 0.436  | 0.322  | 0.391  | 0.396  | -0.009 | -0.086 | -0.081 | 0.110  |
| Afu6g07260 | purine-cytosine permease, putative                         | 2.382  | 1.554  | 1.834  | 1.394  | 0.271  | 0.237  | 0.686  | 0.445  |

## Up-regulated at 18 or 24h

|            |                                                       |        |        |        |        |        |        |        |        |
|------------|-------------------------------------------------------|--------|--------|--------|--------|--------|--------|--------|--------|
| Afu6g08390 | conserved hypothetical protein                        | 0.410  | 0.692  | 0.508  | 0.611  | -0.666 | -0.243 | -0.538 | -0.392 |
| Afu6g09410 | conserved hypothetical protein                        | 1.220  | 0.742  | 1.118  | 0.674  | -0.258 | -0.123 | 0.045  | 0.240  |
| Afu6g09720 | methyltransferase GliN                                | -0.940 | -3.726 | -1.219 | -2.788 | 0.749  | 0.720  | 0.748  | 0.397  |
| Afu6g11160 | isopentenyl-diphosphate delta-isomerase               | 0.540  | -0.207 | 0.601  | 0.179  | 0.640  | 0.633  | 0.480  | 0.831  |
| Afu6g12050 | nonribosomal peptide synthase, putative               | 2.480  | 1.885  | 2.257  | 1.591  | 0.372  | 0.517  | 0.546  | 0.500  |
| Afu6g12060 | MAK1-like monooxygenase, putative                     | 2.099  | NaN    | 1.888  | NaN    | 0.274  | 0.668  | 0.574  | 0.450  |
| Afu6g12070 | FAD binding domain protein                            | 3.116  | 2.902  | 2.313  | 1.952  | 0.489  | 0.310  | 0.628  | 0.437  |
| Afu6g13940 | P450-monooxygenase, putative                          | 1.601  | 1.640  | 1.047  | 1.458  | -0.143 | -0.051 | 0.037  | 0.035  |
| Afu6g13970 | FAD-dependent monooxygenase (PaxM), putative          | 1.563  | 1.133  | 0.931  | 0.981  | 0.111  | 0.153  | 0.213  | -0.018 |
| Afu7g01590 | cystathionine gamma-synthase                          | 0.807  | 0.748  | 0.461  | 0.265  | 0.388  | 0.565  | 0.528  | 0.506  |
| Afu7g02180 | UDP-N-acetylglucosamine pyrophosphorylase             | 0.902  | 0.935  | 0.670  | 0.521  | -0.120 | -0.055 | 0.113  | 0.258  |
| Afu7g02510 | hypothetical protein                                  | 0.608  | 0.469  | 0.480  | 0.448  | -0.062 | -0.079 | 0.013  | -0.047 |
| Afu7g04070 | phospho-2-dehydro-3-deoxyheptonate aldolase           | 0.463  | 0.658  | 0.491  | 0.463  | 0.355  | 0.233  | 0.224  | -0.004 |
| Afu7g05180 | defensin domain protein, putative                     | 4.219  | 0.782  | 2.514  | 1.049  | 1.687  | 1.659  | 1.859  | 2.032  |
| Afu7g06380 | maltase                                               | 2.534  | 2.426  | 2.185  | 1.449  | 0.861  | 0.367  | 1.491  | 1.151  |
| Afu7g06450 | hypothetical protein                                  | 1.536  | -0.020 | 1.243  | NaN    | 0.869  | 1.340  | 1.126  | 1.165  |
| Afu7g06860 | hypothetical protein                                  | 0.525  | 0.475  | 0.408  | 0.366  | 0.233  | 0.096  | 0.051  | 0.174  |
| Afu7g06870 | Tf1-like reverse transcriptase, integrase, putative   | 0.627  | 0.711  | 0.663  | 0.475  | 0.289  | 0.127  | 0.139  | 0.133  |
| Afu7g06880 | hypothetical protein                                  | 0.653  | 0.738  | 0.666  | 0.452  | 0.191  | 0.045  | 0.122  | 0.079  |
| Afu7g08600 | hypothetical protein                                  | 2.176  | 1.491  | 1.581  | 1.470  | 0.198  | 0.063  | 0.195  | 0.085  |
| Afu8g00100 | aspartate-tRNA ligase, putative                       | 1.719  | 1.842  | 1.548  | 1.489  | -0.067 | -0.298 | 0.605  | 0.583  |
| Afu8g00110 | oxidoreductase, 2OG-Fe(II) oxygenase family, putative | 1.802  | 2.163  | 1.278  | 1.319  | -0.091 | -0.383 | 0.544  | 0.311  |
| Afu8g00390 | O-methyltransferase, putative                         | 1.853  | 2.000  | 2.199  | 1.140  | -1.537 | 0.008  | -1.642 | -0.157 |
| Afu8g00400 | conserved hypothetical protein                        | 1.587  | 0.992  | 1.480  | 0.889  | -1.282 | 0.033  | -1.535 | -0.191 |
| Afu8g00740 | cytochrome P450, putative                             | 0.604  | 0.479  | 0.754  | 0.583  | -0.516 | -0.634 | 0.187  | 0.136  |
| Afu8g01980 | hypothetical protein                                  | 2.384  | 2.454  | 1.551  | 1.246  | 0.185  | -0.077 | 0.063  | 0.232  |
| Afu8g02620 | CobW domain protein                                   | 0.858  | 0.945  | 0.845  | 0.502  | 0.141  | 0.548  | -0.822 | 0.027  |
| Afu8g04290 | C2H2 finger domain protein, putative                  | 1.545  | 1.605  | 1.248  | 1.063  | 0.444  | 0.047  | 0.345  | 0.186  |
| Afu8g04890 | hypothetical protein                                  | 0.310  | 0.350  | 0.560  | 0.411  | 0.499  | 0.507  | 0.395  | 0.468  |
| Afu8g06030 | alpha-1,3-glucanase, putative                         | 1.609  | 1.817  | 1.269  | 1.551  | -0.101 | -0.022 | 0.197  | -0.078 |
| Afu8g06080 | flavoheprotein, putative                              | 0.524  | NaN    | 0.639  | 0.524  | 0.790  | 0.826  | 0.884  | 0.336  |

### Real-time PCR verification

Real-time PCR verification of microarray results. Organisms grown in RPMI medium for 18 h  
Gene expression levels are presented in terms of the absolute ratio of the mutant strains to strain Af293.

| Locus   | Name/function                            | $\Delta acuM$ | $\Delta acuM::acuM$ |
|---------|------------------------------------------|---------------|---------------------|
| 2g07680 | L-ornithine N <sup>5</sup> -oxygenase    | 0.18          | 0.58                |
| 3g03400 | Siderophore biosynthesis acetylase Acel  | 0.43          | 1.07                |
| 3g03390 | Siderophore biosynthesis lipase/esterase | 0.86          | 1.30                |
| 3g03640 | Siderophore transporter                  | 0.82          | 1.02                |
| 7g06060 | Siderophore transporter (Sit1)           | 0.77          | 1.45                |
| 7g04730 | Siderophore transporter                  | 0.66          | 0.93                |
| 1g17270 | Ferric-chelate reductase                 | 0.47          | 0.97                |
| 5g03800 | High-affinity iron permease FtrA         | 0.55          | 1.43                |
| 5g03920 | bZIP transcription factor (HapX)         | 0.61          | 1.04                |

Real-time PCR verification of microarray results.

Organisms grown in Sabrouaud Dextrose broth with 25  $\mu$ M phenanthroline for 24 h.

Gene expression levels are presented in terms of the absolute ratio of the mutant strains to strain Af293.

| Locus   | Name/function                         | $\Delta acuM$ | $\Delta acuM::acuM$ |
|---------|---------------------------------------|---------------|---------------------|
| 1g17270 | Ferric-chelate reductase              | 0.21          | 0.89                |
| 5g03800 | High-affinity iron permease FtrA      | 0.51          | 0.81                |
| 1g17200 | Nonribosomal peptide synthase         | 0.34          | 0.86                |
| 2g05730 | Siderophore transporter (MirC)        | 0.43          | 0.74                |
| 5g03920 | bZIP transcription factor (HapX)      | 0.34          | 1.18                |
| 3g03640 | Siderophore transporter               | 0.26          | 0.77                |
| 2g07680 | L-ornithine N <sup>5</sup> -oxygenase | 0.45          | 0.76                |
| 3g03350 | Nonribosomal peptide synthase SidE    | 0.56          | 1.01                |

Specific Go Terms

**Table 3.** Expression levels of genes annotated to specific GO terms

|                                       |                                                      | <b>18 hour<sup>a</sup></b> | <b>24 hour<sup>b</sup></b> |
|---------------------------------------|------------------------------------------------------|----------------------------|----------------------------|
| <b>siderophore-iron transport</b>     |                                                      |                            |                            |
| Afu3g03440                            | MFS family siderophore transporter                   | 0.33                       | 0.45                       |
| Afu3g03640                            | siderochrome-iron transporter (MirB)                 | 0.25                       | 0.37                       |
| Afu7g04730                            | siderochrome-iron transporter                        | 0.41                       | 0.55                       |
| Afu7g06060                            | siderochrome-iron transporter (Sit1)                 | 0.46                       | 0.48                       |
| <b>glutamate biosynthesis</b>         |                                                      |                            |                            |
| Afu1g12800                            | isocitrate dehydrogenase, NAD-dependent              | 0.92                       | 0.82                       |
| Afu4g06620                            | Glutamate/Leucine/Phenylalanine/Valine dehydrogenase | 0.17                       | 0.29                       |
| Afu5g04230                            | citrate synthase, eukaryotic                         | 0.67                       | 0.58                       |
| Afu6g08750                            | delta-1-pyrroline-5-carboxylate dehydrogenase        | 0.30                       | 0.36                       |
| <b>iron ion homeostasis</b>           |                                                      |                            |                            |
| Afu3g03440                            | MFS family siderophore transporter                   | 0.33                       | 0.45                       |
| Afu3g03640                            | siderochrome-iron transporter (MirB)                 | 0.25                       | 0.37                       |
| Afu7g04730                            | siderochrome-iron transporter                        | 0.41                       | 0.55                       |
| Afu7g06060                            | siderochrome-iron transporter (Sit1)                 | 0.46                       | 0.48                       |
| <b>glyoxylate cycle</b>               |                                                      |                            |                            |
| Afu1g09470                            | aminotransferase, class V, putative                  | 0.74                       | 0.69                       |
| Afu4g13510                            | isocitrate lyase                                     | 0.56                       | 0.27                       |
| <b>gluconeogenesis</b>                |                                                      |                            |                            |
| Afu1g10350                            | phosphoglycerate kinase PgkA, putative               | 0.59                       | 0.58                       |
| Afu4g11310                            | fructose-1,6-bisphosphatase                          | 0.24                       | 0.38                       |
| Afu6g07720                            | phosphoenolpyruvate carboxykinase (ATP)              | 0.06                       | 0.06                       |
| Afu7g05800                            | fructose-2,6-bisphosphatase                          | 0.64                       | 0.69                       |
| <b>methionine metabolism</b>          |                                                      |                            |                            |
| Afu1g10130                            | adenosylhomocysteinase                               | 0.28                       | 0.93                       |
| Afu1g10630                            | S-adenosylmethionine synthetase                      | 0.25                       | 0.94                       |
| Afu2g11300                            | G2882                                                | 0.43                       | 1.20                       |
| Afu3g06600                            | siroheme synthase                                    | 0.65                       | 1.16                       |
| Afu5g04250                            | homocysteine synthase                                | 0.33                       | 0.80                       |
| <b>one-carbon compound metabolism</b> |                                                      |                            |                            |
| Afu1g10780                            | glycine cleavage system T protein                    | 0.53                       | 1.10                       |

### Specific Go Terms

|            |                                    |      |      |
|------------|------------------------------------|------|------|
| Afu1g12070 | glycine cleavage system H protein  | 0.46 | 0.99 |
| Afu2g07810 | cytosolic hydroxymethyltransferase | 0.54 | 0.89 |

<sup>a, b</sup> the combined results of four replicates microarray analysis.  
Gene expression changes in  $\Delta acuM$  are the absolute ratio compared to wild-type and *acuM* complemented strains.
